# Supplementary material
Source: publisher site journal article supplement (https://www.degruyterbrill.com/publication/isbn/9783110460247/downloadAsset/9783110460247_Beilage_WulffNetz.pdf)

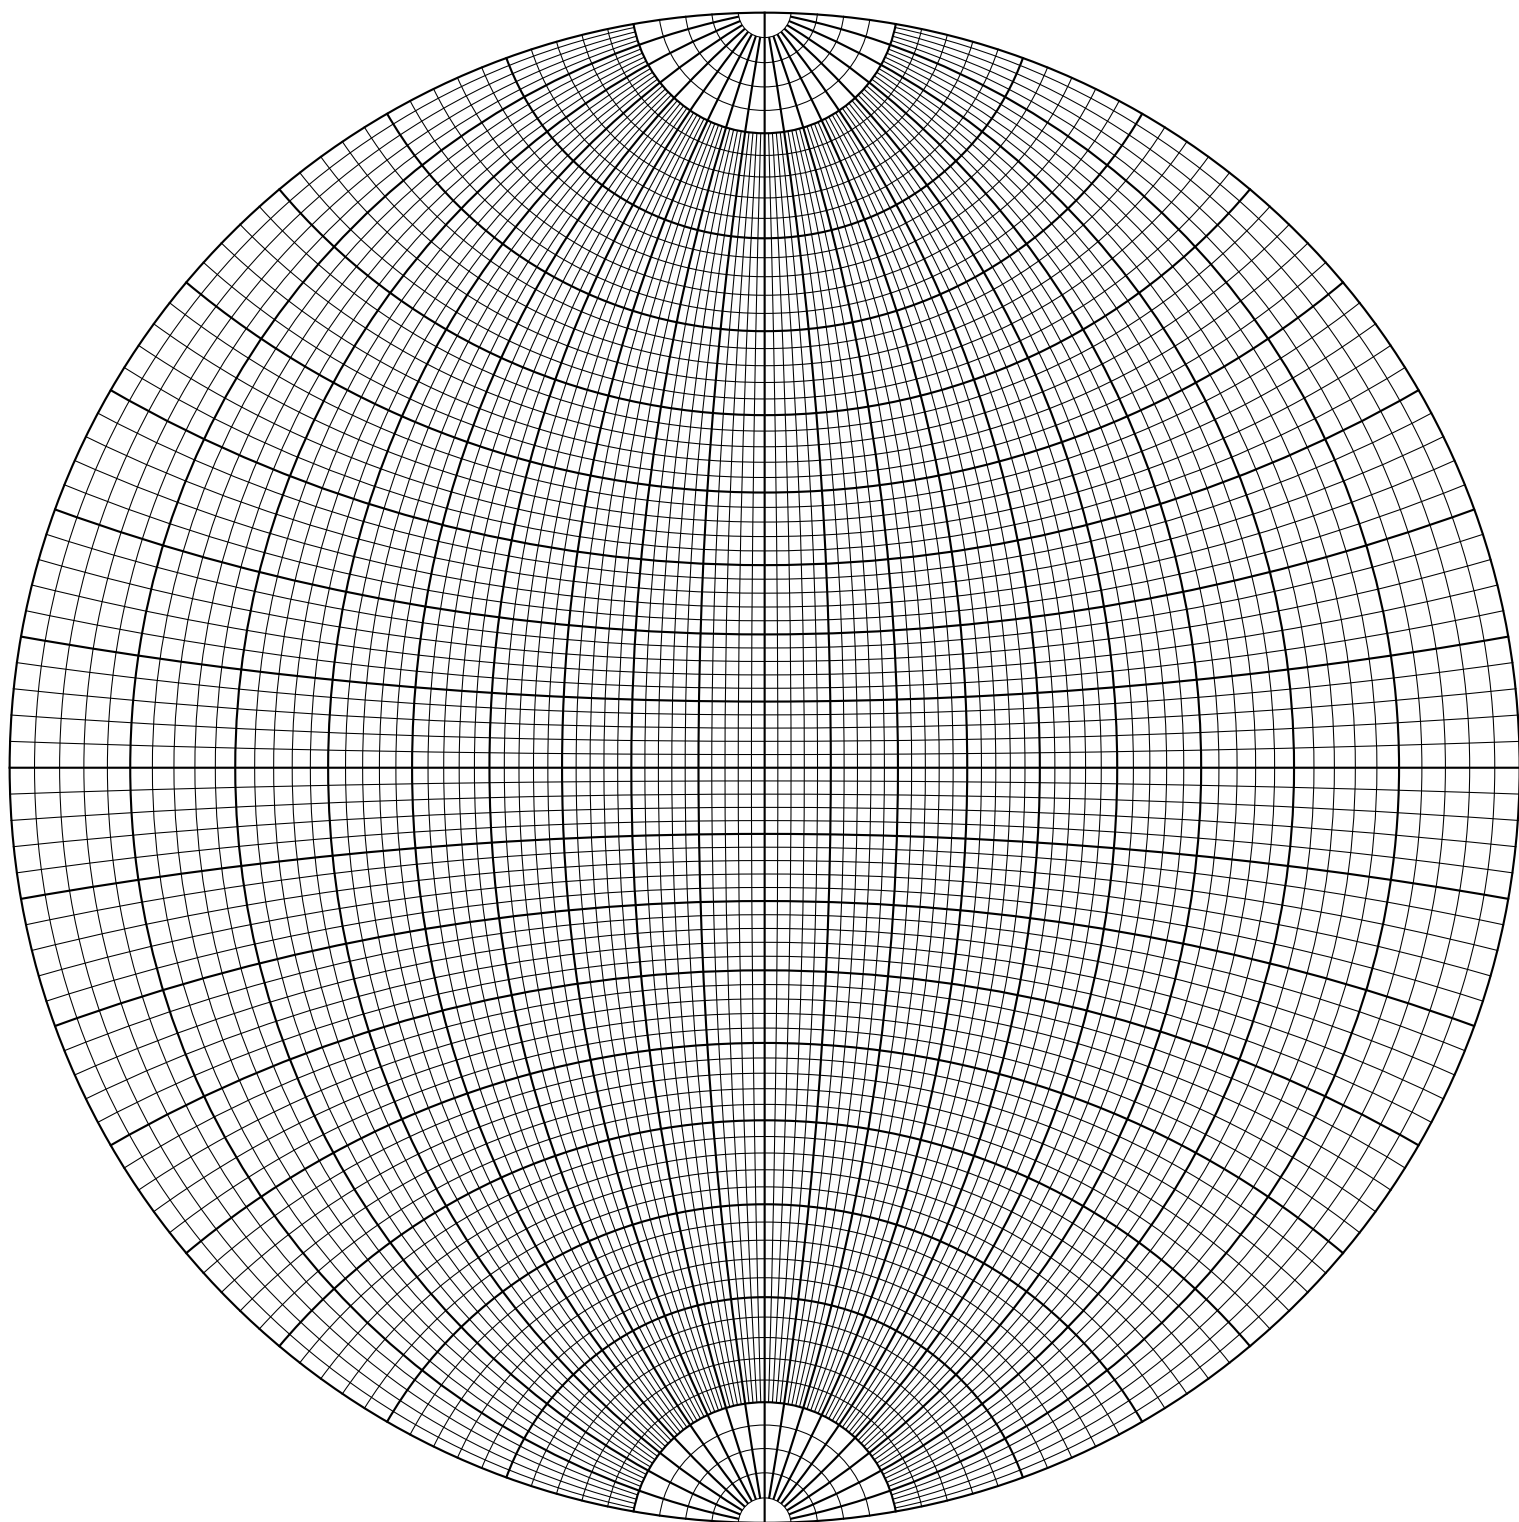

Beilage zu  
„Einführung in die Kristallographie“  
Oldenbourg Verlag München

Das WULFFsche Netz

Supplement: Supplementary file 1 [file 9783110460247_Beilage_WulffNetz.pdf]
